# Supplementary material for: Reasons for Taking the COVID-19 Vaccine by US Social Media Users
Source: PubMed Central journal article supplement (PMC8067223; doi:10.3390/vaccines9040315), 2021-03-29
Supplement: vaccines-09-00315-s001.pdf [file vaccines-09-00315-s001.pdf]

## Supplementary material: Survey questionnaire

Dear Participant,

With the rise of public interest and concerns around the new COVID-19 vaccines, it is important for our Public Health scientific community to understand which factors influence vaccination compliance. To this end, we have prepared a short survey, where you can anonymously express your opinion about the COVID-19 vaccination.

This survey focuses on the United States of America only. Please fill it only if you are living in the USA. The survey should guide the decision-makers to adapt their public health strategy.

We will be grateful if you will dedicate, in a voluntary and anonymous manner, five minutes to address the following 12 questions.

\* At the end of the questionnaire, you need to submit it by clicking on "Submit".

Thanks for taking a part in this survey.

Stay safe,

The Investigators

Prof. Abraham Seidmann, Boston University, Boston, MA, USA; Dr. Arriel Benis, Holon Institute of Technology, Holon, Israel; Prof. Shai Ashkenazi, Ariel University, Israel

This survey has been granted by the relevant Ethics Committee of the Holon Institute of Technology (<https://www.hit.ac.il/en/>).

By moving to the next page of this survey, I hereby certify that I am over eighteen (18) years of age and I agree to take part in it.

1. Will you recommend the COVID-19 immunization to your friends and family?
  - Yes
  - No
  - Maybe
2. Will you (or did you) take the COVID-19 vaccine?
  - Yes
  - No
  - Maybe

3. Please explain your motivation to vaccinate or not

|                                                                       | Completely disagree | Somewhat disagree | Neutral/<br>No opinion | Somewhat agree | Completely agree |
|-----------------------------------------------------------------------|---------------------|-------------------|------------------------|----------------|------------------|
| Fear of the COVID-19 disease                                          |                     |                   |                        |                |                  |
| To protect my family and our relatives                                |                     |                   |                        |                |                  |
| Confidence in our healthcare providers                                |                     |                   |                        |                |                  |
| Confidence in our pharmaceutical industry                             |                     |                   |                        |                |                  |
| The COVID-19 vaccines are revolutionary and use innovative technology |                     |                   |                        |                |                  |
| Employer recommends / demands                                         |                     |                   |                        |                |                  |
| Confidence in governmental leadership's guidance                      |                     |                   |                        |                |                  |
| It is my civic responsibility to take this vaccine                    |                     |                   |                        |                |                  |
| Myself or relatives got sick with COVID-19                            |                     |                   |                        |                |                  |
| Free of charge                                                        |                     |                   |                        |                |                  |

4. Are you, or any close members of your family, at high risk of COVID-19 complications (due to Obesity, Cardiovascular disease, Respiratory disease, or any other chronic disease)?

- Yes
- No
- Prefer to not say

5. Were you, or one of your relatives, positively diagnosed with COVID-19?

- Yes
- No

6. What is your age group (in years)?

- 18-24
- 25-34
- 35-44
- 45-54
- 55-64
- 65-74
- 75+

7. What is your gender?

- Woman
- Man
- Non-binary
- Prefer to not say
- Other

8. What is your marital status?

- Single
- Married / Civil Union
- Separated / Divorced

- Widowed
- Prefer not to say

9. How many children do you have?

- 0
- 1
- 2
- 3
- 4 and more

10. What is your education level?

- Less than high school
- High school or some college
- Bachelor's degree
- Postgraduate degree
- Prefer to not say

11. What is your state of residence?

- |                      |                       |                       |
|----------------------|-----------------------|-----------------------|
| • Alabama (AL)       | • Louisiana (LA)      | • Ohio (OH)           |
| • Alaska (AK)        | • Maine (ME)          | • Oklahoma (OK)       |
| • Arizona (AZ)       | • Maryland (MD)       | • Oregon (OR)         |
| • Arkansas (AR)      | • Massachusetts (MA)  | • Pennsylvania (PA)   |
| • California (CA)    | • Michigan (MI)       | • Puerto Rico (PR)    |
| • Colorado (CO)      | • Minnesota (MN)      | • Rhode Island (RI)   |
| • Connecticut (CT)   | • Mississippi (MS)    | • South Carolina (SC) |
| • Delaware (DE)      | • Missouri (MO)       | • South Dakota (SD)   |
| • Washington DC (DC) | • Montana (MT)        | • Tennessee (TN)      |
| • Florida (FL)       | • Nebraska (NE)       | • Texas (TX)          |
| • Georgia (GA)       | • Nevada (NV)         | • Utah (UT)           |
| • Hawaii (HI)        | • New Hampshire (NH)  | • Vermont (VT)        |
| • Idaho (ID)         | • New Jersey (NJ)     | • Virginia (VA)       |
| • Illinois (IL)      | • New Mexico (NM)     | • Washington (WA)     |
| • Indiana (IN)       | • New York (NY)       | • West Virginia (WV)  |
| • Iowa (IA)          | • North Carolina (NC) | • Wisconsin (WI)      |
| • Kansas (KA)        | • North Dakota (ND)   | • Wyoming (WY)        |
| • Kentucky (KY)      |                       |                       |

12. To which race/ethnicity are you related? (categories according to the US Census Bureau)

- White
- Black or African American
- American Indian and Alaska Native
- Asian
- Native Hawaiian and other Pacific Islander
- Two or more races
- Hispanic or Latino
- Prefer not to say
